# Supplementary material for: Production of a monoclonal antibody for the detection of vitamin B1 and its use in an indirect enzyme-linked immunosorbent assay and immunochromatographic strip
Source: Royal Society of Chemistry journal article supplement (doi:10.1039/c9tb02839k), 2020-01-01
Supplement: c9tb02839k1.pdf [file c9tb02839k1.pdf]

# Supporting information

1

2 **Caption:**

3 **Fig. S1** The synthesis of vitamin B<sub>1</sub>-HS.

4 **Fig. S2** Liquid chromatography tandem mass spectrometry (LC-MS/MS) of vitamin  
5 B<sub>1</sub>

6 **Fig. S3** Characterization of vitamin B<sub>1</sub>-HS. (a) The <sup>1</sup>H NMR of vitamin B<sub>1</sub>-HS; (b) The  
7 chromatogram spectrum of vitamin B<sub>1</sub>-HS; (c) The mass spectrum of vitamin B<sub>1</sub>-HS.

8 **Fig. S4** The UV-Vis spectroscopy of hapten, proteins and conjugates. (a) Confirmation  
9 of immunogen vitamin B<sub>1</sub>-HS-BSA; (b) Confirmation of coating antigen vitamin B<sub>1</sub>-  
10 HS-OVA.

11 **Fig. S5** Characterization of the colloidal gold. (a) TEM images; (b) UV-Vis spectrum.

12 **Fig. S6** The optimization of ICT strip. (a) Optimization of two coating antigen: 1, 2  
13 represent the concentration of coating antigen at 0.05 mg/mL and 0.1 mg/mL,  
14 respectively; (b) Optimization of pH values: 1, 2, and 3 represent the pH value at 7.4,  
15 8.0 and 9.0, respectively; (c) Optimization the concentration of mAb: 1, 2, 3, 4, 5, and  
16 6 represent the concentration of mAb at 4, 8, 10, 12, and 16 µg/mL, respectively. N: 0  
17 ng/mL; P: 250 ng/mL.

18 **Fig. S7** The calibration curve for the LC-MS/MS of vitamin B<sub>1</sub>.

19

20

21

22

23

24

25

26

27

28

29

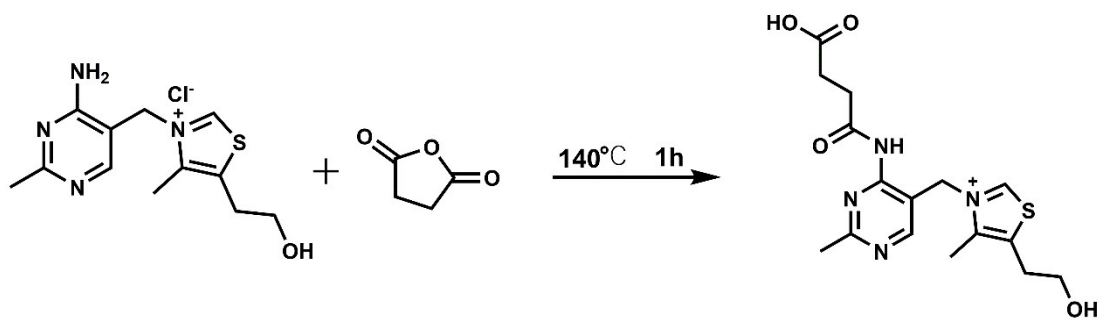

30  
31  
32  
33  
34  
35  
36  
37  
38  
39  
40  
41  
42  
43  
44  
45  
46  
47  
48  
49  
50  
51  
52  
53  
54  
55  
56  
57  
58  
59  
60  
61  
62  
63  
64

**Fig. S1** The synthesis of vitamin B<sub>1</sub>-HS

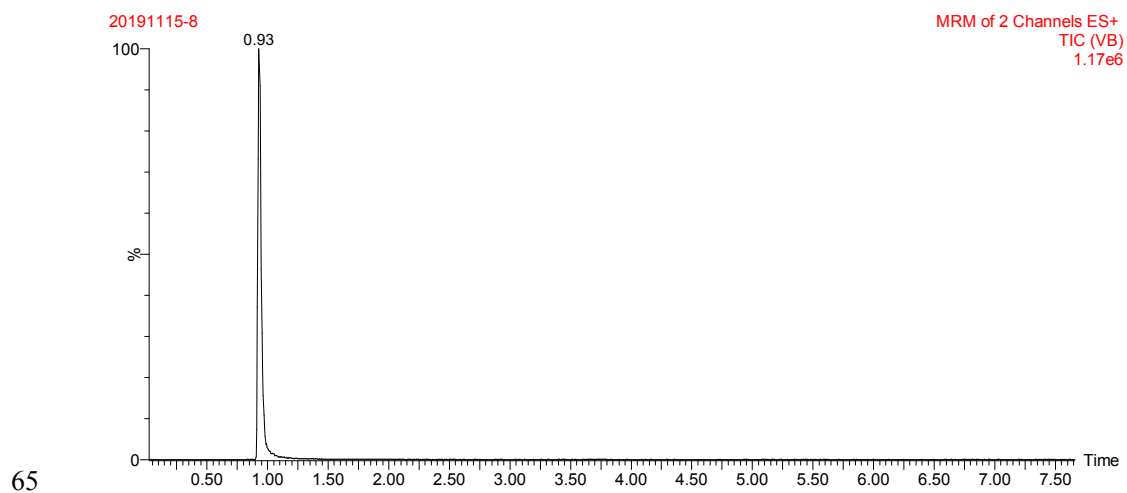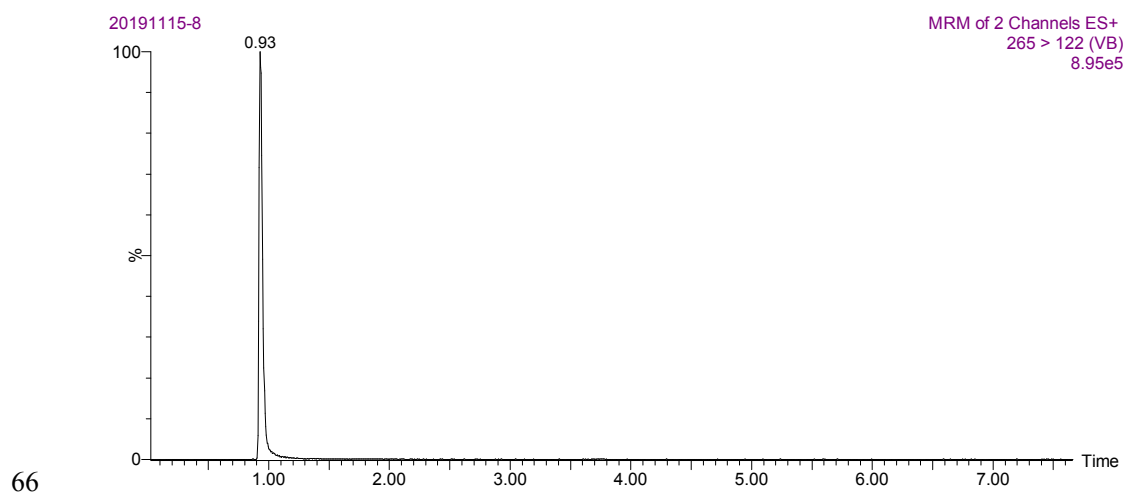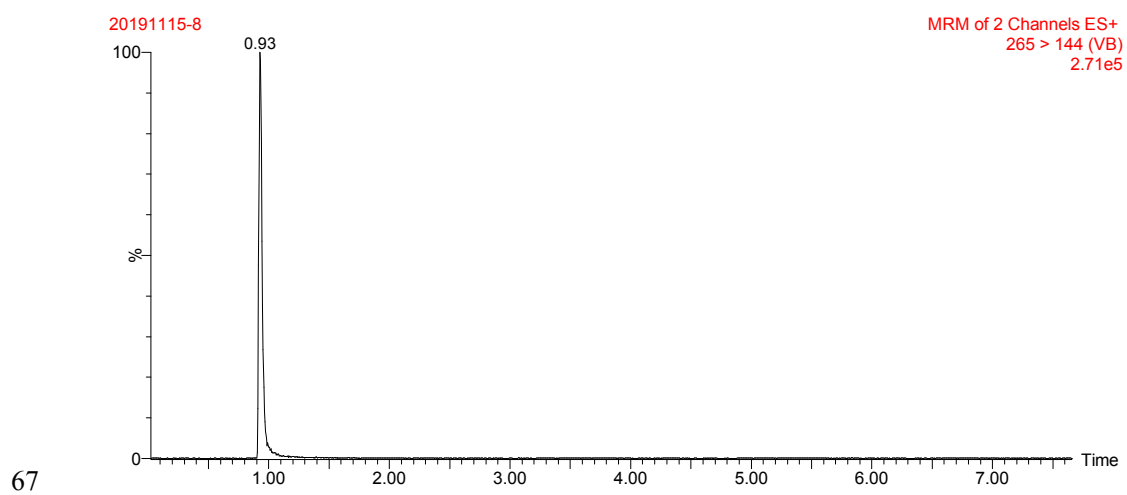

68 **Fig. S2** Liquid chromatography tandem mass spectrometry (LC-MS/MS) of vitamin

69  $B_1$

70

71

72

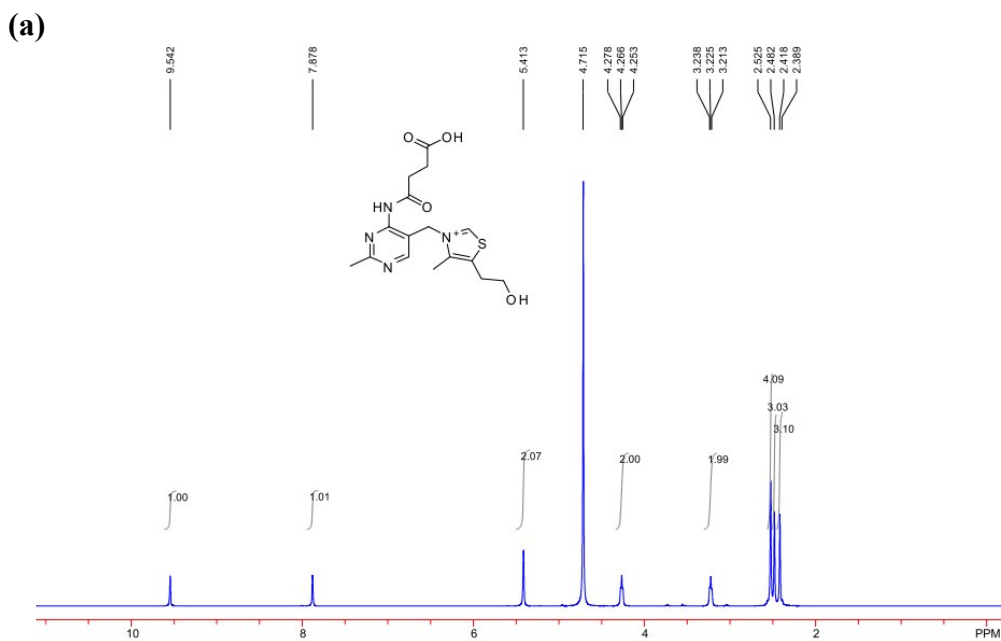

73

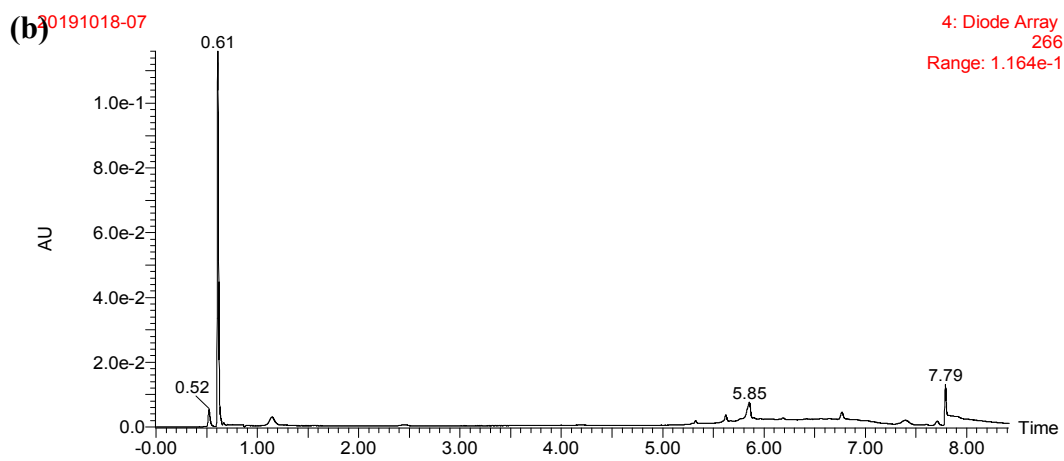

74

75

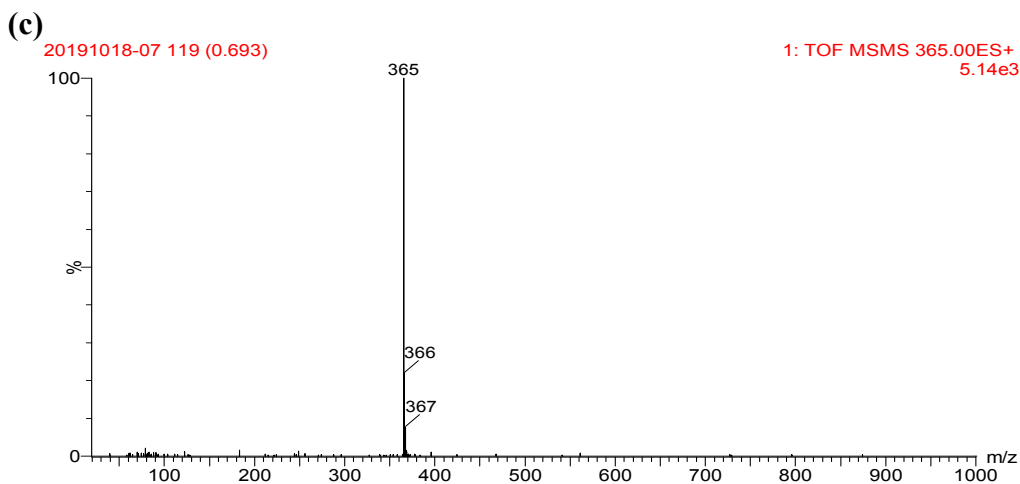

76

77

78 **Fig. S3** Characterization of vitamin B<sub>1</sub>-HS. (a) The <sup>1</sup>H NMR of vitamin B<sub>1</sub>-HS; (b)

79 The chromatogram spectrum of vitamin B<sub>1</sub>-HS; (c) The mass spectrum of vitamin B<sub>1</sub>-

80

HS.

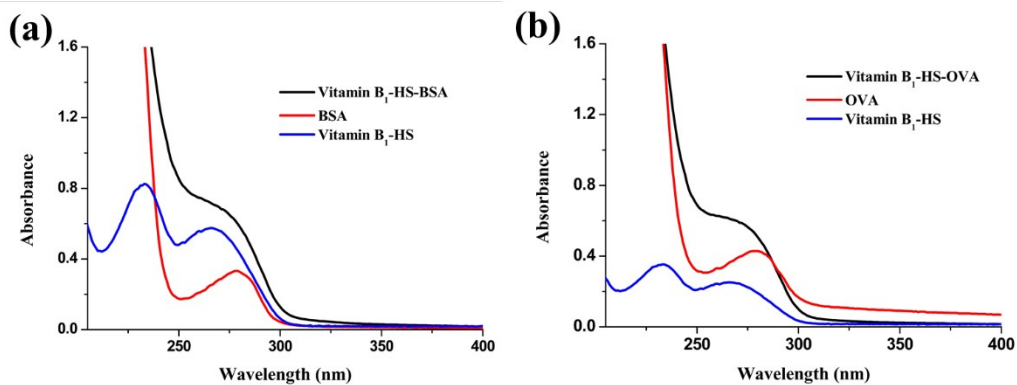

81

82

83

84

85

86

87

88

89

90

91

92

93

94

95

96

97

98

99

100

101

102

103

104

**Fig. S4** The UV-Vis spectroscopy of hapten, proteins and conjugates. (a) Confirmation of immunogen vitamin B<sub>1</sub>-HS-BSA; (b) Confirmation of coating antigen vitamin B<sub>1</sub>-HS-OVA.

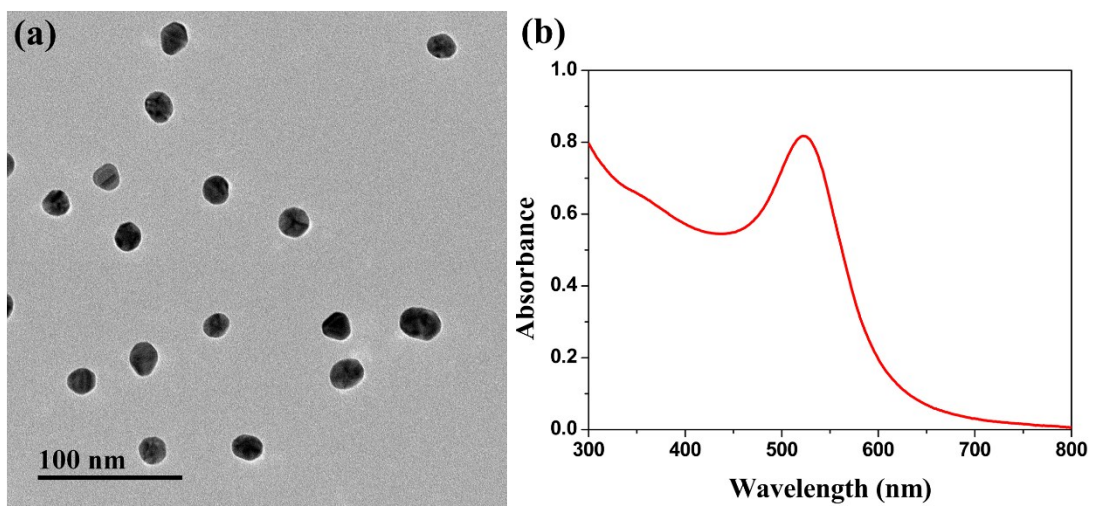

105

106 **Fig. S5** Characterization of the colloidal gold. (a) TEM images; (b) UV-Vis spectrum.

107

108

109

110

111

112

113

114

115

116

117

118

119

120

121

122

123

124

125

126

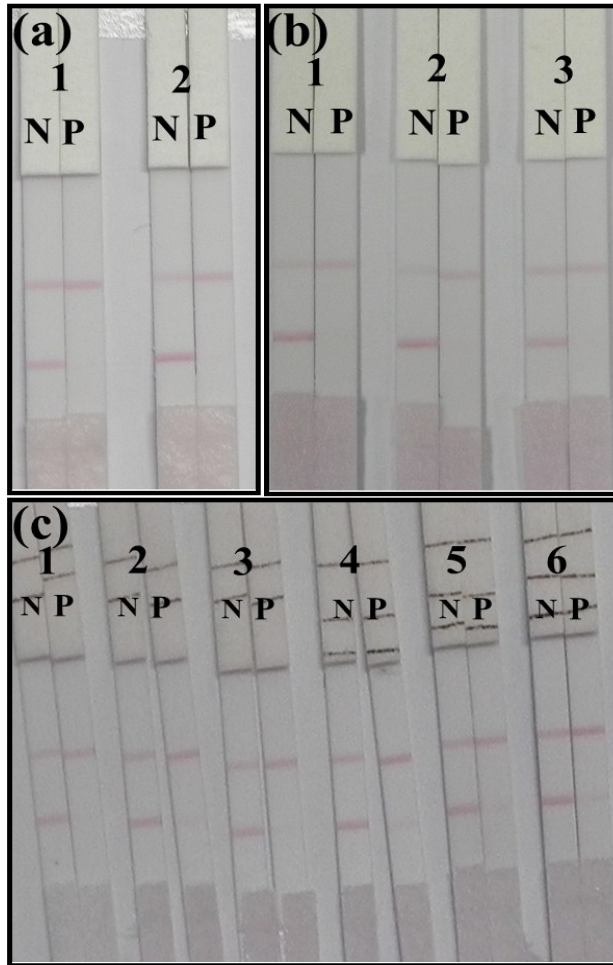

127

128 **Fig. S6** The optimization of ICT strip. (a) Optimization of two coating antigen: 1, 2  
 129 represent the concentration of coating antigen at 0.05 mg/mL and 0.1 mg/mL,  
 130 respectively; (b) Optimization of pH values: 1, 2, and 3 represent the pH value at 7.4,  
 131 8.0 and 9.0, respectively; (c) Optimization the concentration of mAb: 1, 2, 3, 4, 5, and  
 132 6 represent the concentration of mAb at 4, 8, 10, 12, and 16 µg/mL, respectively. N: 0  
 133 ng/mL; P: 250 ng/mL.

134

135

136

137

138

139

140

141

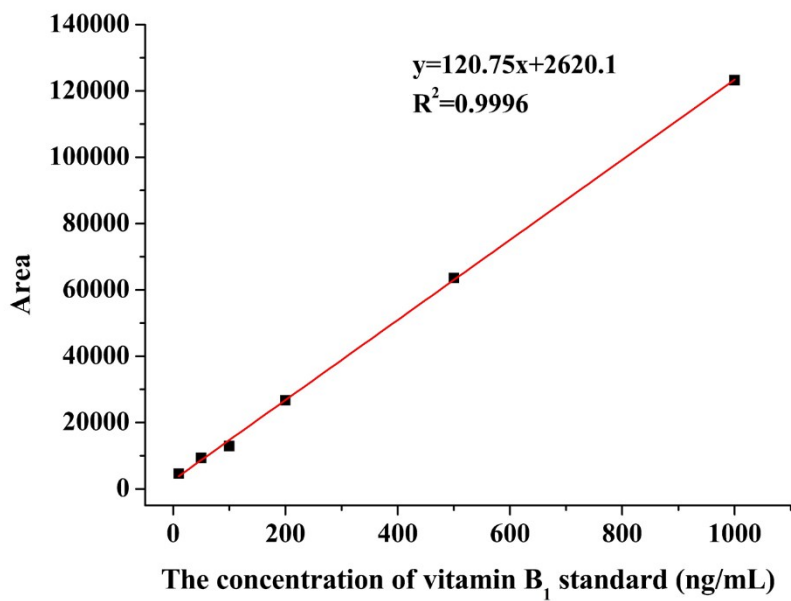

142

143

**Fig. S7** The calibration curve for the LC-MS/MS of vitamin B<sub>1</sub>.

144

145

146
